# Supplementary material for: Theoretical Investigations on the Sensing Mechanism of Phenanthroimidazole Fluorescent Probes for the Detection of Selenocysteine
Source: MDPI journal article supplement (doi:10.3390/molecules27238444), 2022-12-02
Supplement: s1 [file s1]

**Supporting information**

**Theoretical investigations on the sensing mechanism  
of phenanthroimidazole fluorescent probes for the  
detection of selenocysteine**

Zhe Tang <sup>a,b</sup>, Xiaochen Wang <sup>b,c</sup>, Runze Liu <sup>b\*</sup>, Panwang Zhou <sup>b\*</sup>

<sup>a</sup> *Tianjin Key Laboratory of Drug Targeting and Bioimaging, Life and Health Intelligent Research  
Institute, Tianjin University of Technology, Tianjin 300384, China.*

<sup>b</sup> *Institute of Molecular Sciences and Engineering, Institute of Frontier and Interdisciplinary  
Science, Shandong University, Qingdao 266237, China.*

<sup>c</sup> *Key Laboratory of Materials Modification by Laser, Ion and Electron Beams, Ministry of  
Education, Dalian University of Technology, Dalian 116024, China*

**Table S1.** CAM-B3LYP-D3/TZVP/IEFPCM levels calculated electronic excitation energies (nm), corresponding oscillator intensities and corresponding compositions for the A3 and A4 compounds.

|    | Transition            | $\lambda(\text{nm})$ | $f^a$  | Composition <sup>b</sup> | CI(%) <sup>c</sup> |
|----|-----------------------|----------------------|--------|--------------------------|--------------------|
| A3 | $S_0 \rightarrow S_1$ | 312                  | 0.6783 | H $\rightarrow$ L        | 82.96%             |
|    | $S_0 \rightarrow S_1$ | 353                  | 0.0037 | H $\rightarrow$ L        | 91.47%             |
| A4 | $S_0 \rightarrow S_2$ | 315                  | 0.0001 | H-11 $\rightarrow$ L     | 71.65%             |
|    | $S_0 \rightarrow S_3$ | 312                  | 0.0113 | H-7 $\rightarrow$ L+1    | 34.21%             |
|    | $S_0 \rightarrow S_4$ | 309                  | 0.6359 | H $\rightarrow$ L+2      | 74.14%             |

**Table S2.** CAM-B3LYP-D3/TZVP/IEFPCM levels calculated emission energies (nm), corresponding oscillator intensities and corresponding compositions for the A3 and A4 compounds.

|         | Transition            | $\lambda(\text{nm})$ | $f^a$  | Composition <sup>b</sup> | CI(%) <sup>c</sup> |
|---------|-----------------------|----------------------|--------|--------------------------|--------------------|
| A3-Enol | $S_1 \rightarrow S_0$ | 378                  | 1.2673 | L $\rightarrow$ H        | 94.68%             |
| A3-Keto | $S_1 \rightarrow S_0$ | 415                  | 0.8502 | L $\rightarrow$ H        | 91.75%             |
| A4      | $S_1 \rightarrow S_0$ | 499                  | 0.0069 | L $\rightarrow$ H        | 95.24%             |

**Table S3.** CAM-B3LYP-D3/TZVP/IEFPCM levels calculated electronic excitation energies (nm), corresponding oscillator intensities and corresponding compositions for the B3 and B4 compounds.

|    | Transition            | $\lambda(\text{nm})$ | $f^a$  | Composition <sup>b</sup> | CI(%) <sup>c</sup> |
|----|-----------------------|----------------------|--------|--------------------------|--------------------|
| B3 | $S_0 \rightarrow S_1$ | 310                  | 0.4681 | H $\rightarrow$ L        | 77.54%             |
|    | $S_0 \rightarrow S_1$ | 346                  | 0.0525 | H $\rightarrow$ L        | 94.47%             |
| B4 | $S_0 \rightarrow S_2$ | 314                  | 0.0000 | H-11 $\rightarrow$ L     | 67.23%             |
|    | $S_0 \rightarrow S_3$ | 312                  | 0.8599 | H $\rightarrow$ L+2      | 71.78%             |

**Table S4.** CAM-B3LYP-D3/TZVP/IEFPCM levels calculated emission energies (nm), corresponding oscillator intensities and corresponding compositions for the B3 and B4 compounds.

|    | Transition            | $\lambda(\text{nm})$ | $f^a$  | Composition <sup>b</sup> | CI(%) <sup>c</sup> |
|----|-----------------------|----------------------|--------|--------------------------|--------------------|
| B3 | $S_1 \rightarrow S_0$ | 376                  | 1.3738 | H $\rightarrow$ L        | 95.74%             |
| B4 | $S_1 \rightarrow S_0$ | 476                  | 0.0332 | H $\rightarrow$ L        | 95.83%             |

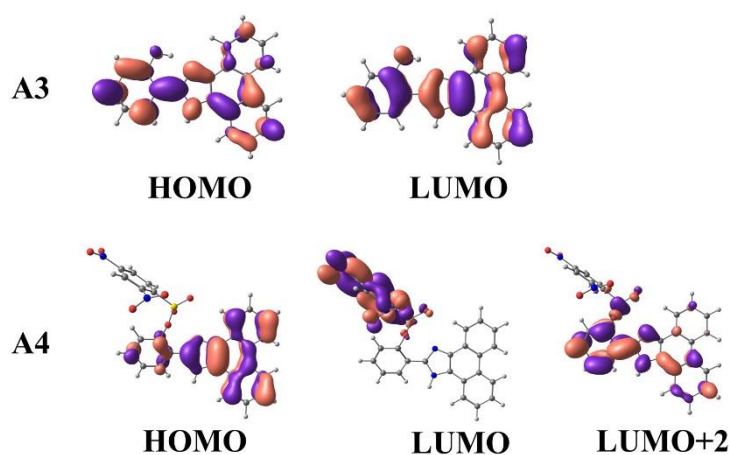

Figure S1. The frontier molecular orbitals of A3 and A4 forms in water solvent based on CAM-B3LYP-D3/TZVP/IEFPCM levels.

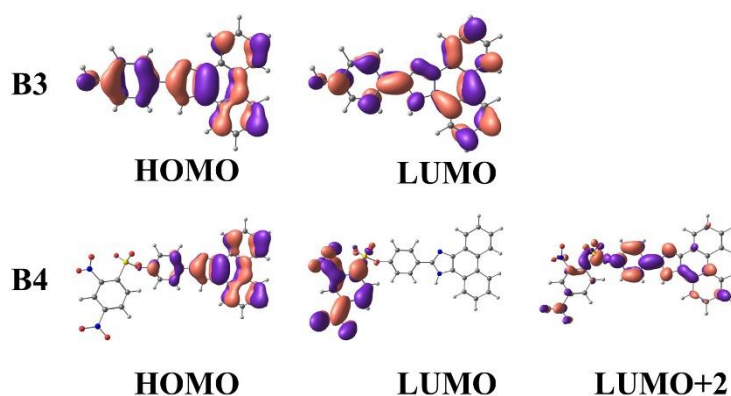

Figure S2. The frontier molecular orbitals of B3 and B4 forms in DMF solvent based on CAM-B3LYP-D3/TZVP/IEFPCM levels.

So geometry of A3-Enol in Water solvent, B3LYP/TZVP/IEFPCM,  
empirical dispersion=gd3

Energy=-993.818977

|   |             |             |             |
|---|-------------|-------------|-------------|
| C | 3.78897300  | 3.02368700  | -0.00007700 |
| C | 3.91927000  | 1.64876900  | 0.00012500  |
| C | 2.79368100  | 0.79831100  | 0.00064000  |
| C | 1.51040500  | 1.41703900  | -0.00074800 |
| C | 1.39364300  | 2.81878300  | -0.00042800 |
| C | 2.51821000  | 3.61654300  | -0.00049100 |
| C | 2.91412300  | -0.66402700 | -0.00095600 |
| C | 1.74878700  | -1.48841200 | 0.00125500  |
| C | 0.49298700  | -0.81551000 | -0.00082700 |
| C | 0.36399000  | 0.56144400  | 0.00141700  |
| C | 4.16316000  | -1.31784400 | -0.00087700 |
| C | 4.26394200  | -2.69531000 | -0.00048100 |
| C | 3.10996300  | -3.49076000 | 0.00071900  |
| C | 1.86864400  | -2.89129800 | 0.00118800  |
| N | -0.79530300 | -1.30643000 | -0.00070000 |
| C | -1.64990100 | -0.23662500 | -0.00004700 |
| N | -0.96690100 | 0.90507800  | 0.00095300  |
| C | -3.10192100 | -0.31028300 | -0.00001600 |
| C | -3.78857200 | -1.53461100 | -0.00050100 |
| C | -5.17223500 | -1.58665500 | -0.00070000 |
| C | -5.90424400 | -0.39714400 | -0.00042100 |
| C | -5.25303900 | 0.82626800  | 0.00012000  |
| C | -3.85747400 | 0.88926700  | 0.00026700  |
| H | 4.67573000  | 3.64521700  | -0.00008900 |
| H | 4.91539800  | 1.22987800  | 0.00065600  |
| H | 0.40447300  | 3.25860400  | -0.00071800 |
| H | 2.42160900  | 4.69512800  | -0.00059300 |

|   |             |             |             |
|---|-------------|-------------|-------------|
| H | 5.07577400  | -0.73917800 | -0.00194500 |
| H | 5.24150800  | -3.16082500 | -0.00088000 |
| H | 3.19221500  | -4.57028000 | 0.00110300  |
| H | 0.97754700  | -3.50675300 | 0.00227500  |
| H | -3.23314700 | -2.46406600 | -0.00063300 |
| H | -5.67834000 | -2.54292800 | -0.00106800 |
| H | -5.80706100 | 1.75633000  | 0.00041900  |
| H | -1.06122600 | -2.27761800 | -0.00255800 |
| H | -6.98679700 | -0.42580300 | -0.00053200 |
| O | -3.28057900 | 2.11178300  | 0.00082800  |
| H | -2.29197600 | 1.98770900  | 0.00122000  |

So geometry of A3-Keto in Water solvent, B3LYP/TZVP/IEFPCM,  
empirical dispersion=gd3

Energy=-993.808635

|   |             |             |             |
|---|-------------|-------------|-------------|
| C | -3.78248800 | 3.02319200  | -0.00144000 |
| C | -3.91365600 | 1.64888900  | -0.00050200 |
| C | -2.78912500 | 0.79791600  | 0.00113400  |
| C | -1.50630900 | 1.41970200  | -0.00266700 |
| C | -1.38726100 | 2.82186800  | -0.00239600 |
| C | -2.51244500 | 3.61735100  | -0.00258400 |
| C | -2.90812900 | -0.66263100 | -0.00189700 |
| C | -1.74324500 | -1.48722400 | 0.00204500  |
| C | -0.48763300 | -0.81572400 | -0.00440000 |
| C | -0.37530700 | 0.55473200  | 0.00304300  |
| C | -4.15705300 | -1.31710200 | 0.00021000  |
| C | -4.25537100 | -2.69402200 | 0.00142000  |
| C | -3.10082500 | -3.48902600 | 0.00257100  |
| C | -1.85995200 | -2.88995800 | 0.00203500  |
| N | 0.80522300  | -1.32024200 | -0.00355300 |
| C | 1.69239400  | -0.29229800 | -0.00112500 |

|   |             |             |             |
|---|-------------|-------------|-------------|
| N | 0.97363900  | 0.84729900  | 0.00148100  |
| C | 3.11941400  | -0.32019400 | -0.00097800 |
| C | 3.83345800  | -1.53651600 | -0.00385300 |
| C | 5.20996100  | -1.55673100 | -0.00324300 |
| C | 5.91066600  | -0.33332100 | 0.00070000  |
| C | 5.24666600  | 0.87117500  | 0.00384800  |
| C | 3.81824500  | 0.95220600  | 0.00321500  |
| H | -4.66890900 | 3.64482200  | -0.00182600 |
| H | -4.90946400 | 1.23002400  | 0.00017300  |
| H | -0.40358300 | 3.27423900  | -0.00374400 |
| H | -2.41611400 | 4.69558300  | -0.00332800 |
| H | -5.07000800 | -0.73935700 | -0.00044700 |
| H | -5.23225700 | -3.16068400 | 0.00210400  |
| H | -3.18273100 | -4.56839400 | 0.00358000  |
| H | -0.96928500 | -3.50560900 | 0.00342000  |
| H | 3.29587300  | -2.47810100 | -0.00677100 |
| H | 5.74564900  | -2.49663800 | -0.00555200 |
| H | 5.79168800  | 1.80779400  | 0.00693600  |
| H | 1.05838000  | -2.29485700 | -0.00863800 |
| H | 6.99510100  | -0.34285200 | 0.00127800  |
| O | 3.20766900  | 2.08128300  | 0.00638600  |
| H | 1.54025500  | 1.72066100  | 0.00540700  |

S0 geometry of A4 in Water solvent, B3LYP/TZVP/IEFPCM, empiricaldispersion=gd3

Energy= -2182.725358

|   |            |             |             |
|---|------------|-------------|-------------|
| C | 7.89909400 | 0.65707600  | -0.42898500 |
| C | 7.13763000 | -0.48325700 | -0.26097500 |
| C | 5.73717000 | -0.42679100 | -0.11091700 |
| C | 5.13254000 | 0.86636700  | -0.13699500 |
| C | 5.92278200 | 2.01869300  | -0.30788500 |
| C | 7.29030800 | 1.91900500  | -0.45282700 |

|   |             |             |             |
|---|-------------|-------------|-------------|
| C | 4.91854700  | -1.63289800 | 0.06790500  |
| C | 3.50667200  | -1.52944600 | 0.21809900  |
| C | 2.93225800  | -0.21836400 | 0.20156900  |
| C | 3.71587700  | 0.90954100  | 0.01837300  |
| C | 5.47535400  | -2.92895500 | 0.08919600  |
| C | 4.68743400  | -4.05247000 | 0.24832700  |
| C | 3.29725000  | -3.93178700 | 0.38874000  |
| C | 2.71474400  | -2.68167900 | 0.37347300  |
| N | 1.61188400  | 0.12902600  | 0.32968300  |
| C | 1.57472900  | 1.44451000  | 0.22908400  |
| N | 2.83630700  | 1.96564800  | 0.04366600  |
| C | 0.38195700  | 2.28274900  | 0.32523700  |
| C | -0.89452800 | 1.81412700  | -0.01877100 |
| C | -2.01805400 | 2.62316700  | 0.04362800  |
| C | -1.89713300 | 3.93912800  | 0.47290300  |
| C | -0.64557600 | 4.43154300  | 0.83093000  |
| C | 0.47377900  | 3.61461700  | 0.75646300  |
| O | -1.04958900 | 0.51962700  | -0.53993500 |
| S | -1.41173000 | -0.73395200 | 0.49855900  |
| O | -0.85839200 | -1.94302500 | -0.10130200 |
| O | -1.12163600 | -0.34999800 | 1.88065800  |
| C | -3.23089400 | -0.74236400 | 0.33412300  |
| C | -3.95005100 | -0.94418700 | 1.50488700  |
| C | -5.33913500 | -0.93825100 | 1.48445500  |
| C | -5.98515800 | -0.70097600 | 0.28343500  |
| C | -5.29716300 | -0.46811600 | -0.89679900 |
| C | -3.91685600 | -0.51619200 | -0.86003900 |
| N | -3.22387200 | -0.29475100 | -2.15252700 |
| O | -3.52140200 | 0.71848700  | -2.76615300 |
| O | -2.43701900 | -1.14746600 | -2.52328900 |

|   |             |             |             |
|---|-------------|-------------|-------------|
| N | -7.46843200 | -0.67550700 | 0.25156300  |
| O | -8.01006000 | -0.47557800 | -0.82655800 |
| O | -8.06101800 | -0.85716300 | 1.30504200  |
| H | 8.97268800  | 0.57244700  | -0.54149900 |
| H | 7.64407900  | -1.43780100 | -0.24598600 |
| H | 5.45219200  | 2.99406000  | -0.32270700 |
| H | 7.88981900  | 2.81103500  | -0.58334400 |
| H | 6.54191000  | -3.06382200 | -0.02171400 |
| H | 5.14919400  | -5.03201000 | 0.26010000  |
| H | 2.68485500  | -4.81726800 | 0.50687100  |
| H | 1.64246000  | -2.56284100 | 0.46774000  |
| H | 3.05988800  | 2.93349200  | -0.12551400 |
| H | -2.97712500 | 2.22289400  | -0.25497300 |
| H | -2.77342100 | 4.57149000  | 0.52413000  |
| H | -0.54018300 | 5.45237800  | 1.17403400  |
| H | 1.43384300  | 4.00930200  | 1.06209300  |
| H | -3.42663100 | -1.08225600 | 2.43991600  |
| H | -5.90545500 | -1.10214200 | 2.38876700  |
| H | -5.82017300 | -0.26446500 | -1.81908700 |

S<sub>0</sub> geometry of B3 in Water solvent, B3LYP/TZVP/IEFPCM, empirical dispersion=gd3

Energy=-993.809751

|   |            |             |             |
|---|------------|-------------|-------------|
| C | 4.18420000 | 2.92191000  | -0.06112400 |
| C | 4.22825000 | 1.54197000  | -0.02808300 |
| C | 3.05196900 | 0.76268200  | -0.01534700 |
| C | 1.80812100 | 1.45799700  | -0.03629600 |
| C | 1.78059800 | 2.86429200  | -0.07066700 |
| C | 2.95212100 | 3.59136300  | -0.08237100 |
| C | 3.08357700 | -0.70365800 | 0.02277800  |
| C | 1.86929800 | -1.45456400 | 0.02966900  |
| C | 0.65755600 | -0.70595700 | 0.01220300  |



|   |             |             |             |
|---|-------------|-------------|-------------|
| C | 0.60726100  | 0.67725300  | -0.02622300 |
| C | 4.29041100  | -1.43222200 | 0.04711800  |
| C | 4.30773200  | -2.81301600 | 0.07750100  |
| C | 3.10703800  | -3.53626500 | 0.08329900  |
| C | 1.90463900  | -2.86237100 | 0.06039100  |
| N | -0.65767500 | -1.11190900 | 0.01311600  |
| C | -1.44121200 | 0.01770400  | -0.01567900 |
| N | -0.69741500 | 1.11238700  | -0.04117300 |
| C | -2.90157400 | -0.01293400 | -0.01274700 |
| C | -3.62580200 | -1.17977000 | -0.29572700 |
| C | -5.01162400 | -1.18250100 | -0.28274000 |
| C | -5.70762600 | -0.00941400 | 0.00895200  |
| C | -5.00296300 | 1.16413900  | 0.28569900  |
| C | -3.61716600 | 1.15676700  | 0.27517800  |
| O | -7.07120200 | -0.07142300 | 0.00661700  |
| H | 5.10788500  | 3.48718200  | -0.07056200 |
| H | 5.19654400  | 1.06214600  | -0.01307500 |
| H | 0.81986800  | 3.36247500  | -0.08747800 |
| H | 2.92209900  | 4.67367700  | -0.10834300 |
| H | 5.23656200  | -0.91000300 | 0.04335600  |
| H | 5.25513900  | -3.33697000 | 0.09609500  |
| H | 3.12311100  | -4.61866000 | 0.10582600  |
| H | 0.97783400  | -3.42267700 | 0.06342800  |
| H | -3.11595100 | -2.10077800 | -0.54883700 |
| H | -5.56587000 | -2.08490600 | -0.50545500 |
| H | -5.53946400 | 2.07773400  | 0.51418500  |
| H | -3.07444000 | 2.06584700  | 0.49583700  |
| H | -7.44891600 | 0.79267300  | 0.21559900  |
| H | -0.98797800 | -2.06013900 | 0.08818200  |

S0 geometry of B4 in Water solvent, B3LYP/TZVP/IEFPCM, empirical dispersion=gd3

Energy=-2182.723152

|   |             |             |             |
|---|-------------|-------------|-------------|
| C | -8.60346000 | 2.16187800  | -0.96937600 |
| C | -8.42892300 | 0.81003000  | -0.74628900 |
| C | -7.16705700 | 0.27003400  | -0.42018700 |
| C | -6.07266300 | 1.17781500  | -0.32995900 |
| C | -6.26675600 | 2.55164900  | -0.55983900 |
| C | -7.51618800 | 3.04215300  | -0.87619500 |
| C | -6.96633400 | -1.16454300 | -0.18190300 |
| C | -5.67300100 | -1.67124700 | 0.14453100  |
| C | -4.61676400 | -0.71789100 | 0.22014600  |
| C | -4.78634600 | 0.63963000  | 0.00014800  |
| C | -8.02014200 | -2.09761200 | -0.26025300 |
| C | -7.81801400 | -3.44524300 | -0.03373100 |
| C | -6.54109200 | -3.92720100 | 0.28461300  |
| C | -5.48310500 | -3.04763000 | 0.37170700  |
| N | -3.28185100 | -0.87079800 | 0.50876000  |
| C | -2.70060000 | 0.37292900  | 0.44644300  |
| N | -3.59109800 | 1.30224400  | 0.14089400  |
| C | -1.27865700 | 0.61329300  | 0.68343300  |
| C | -0.45490700 | -0.34754400 | 1.28372700  |
| C | 0.89603400  | -0.09903500 | 1.47880900  |
| C | 1.42418200  | 1.12071500  | 1.08099600  |
| C | 0.62545600  | 2.10890900  | 0.51899900  |
| C | -0.71936200 | 1.84418100  | 0.31322300  |
| O | 2.77932800  | 1.34973100  | 1.38268500  |
| H | -9.58705100 | 2.54082400  | -1.21775800 |
| H | -9.29099100 | 0.16338600  | -0.82801100 |
| H | -5.41459000 | 3.21456100  | -0.48309500 |
| H | -7.65778800 | 4.10133400  | -1.05204700 |

|   |             |             |             |
|---|-------------|-------------|-------------|
| H | -9.01923700 | -1.76505300 | -0.50292000 |
| H | -8.65297700 | -4.13111300 | -0.10309900 |
| H | -6.38582300 | -4.98399800 | 0.46137800  |
| H | -4.49606300 | -3.41920800 | 0.61811600  |
| H | -0.85595100 | -1.29328600 | 1.62339300  |
| H | 1.52883500  | -0.83290000 | 1.95913400  |
| H | 1.04812200  | 3.06286500  | 0.24073300  |
| H | -1.35199400 | 2.59713700  | -0.13546100 |
| H | -2.80646300 | -1.74263000 | 0.67710600  |
| S | 3.89293500  | 1.83561900  | 0.24704100  |
| O | 4.76897100  | 2.73763500  | 0.99146000  |
| O | 3.20411600  | 2.24479800  | -0.97731000 |
| C | 4.80013800  | 0.28122300  | -0.05443500 |
| C | 4.10771800  | -0.91885500 | 0.01150200  |
| C | 6.17242700  | 0.26757000  | -0.31405000 |
| C | 4.77659400  | -2.12457500 | -0.15851400 |
| H | 3.04837600  | -0.93123700 | 0.21020200  |
| C | 6.86275200  | -0.92092500 | -0.45342400 |
| C | 6.14286100  | -2.10216500 | -0.37760600 |
| H | 4.24295700  | -3.06169100 | -0.11043500 |
| H | 7.92675000  | -0.92294900 | -0.63645200 |
| N | 6.95686700  | 1.50759300  | -0.52254000 |
| N | 6.87167800  | -3.38459500 | -0.54025700 |
| O | 8.03813400  | 1.58659500  | 0.03577000  |
| O | 6.48218600  | 2.34109500  | -1.27840400 |
| O | 8.07857800  | -3.33177500 | -0.72886500 |
| O | 6.22106100  | -4.41711900 | -0.47490500 |

S1 geometry of A3-Enol in Water solvent, B3LYP/TZVP/IEFPCM,  
empirical dispersion=gd3

Energy=-993.700289

|   |             |             |             |
|---|-------------|-------------|-------------|
| C | -3.78022200 | 3.03019500  | -0.00047800 |
| C | -3.91362200 | 1.64939700  | 0.00100900  |
| C | -2.79482700 | 0.79734900  | -0.00240200 |
| C | -1.50960500 | 1.42283100  | -0.00097900 |
| C | -1.39106300 | 2.82231700  | -0.00404200 |
| C | -2.51535900 | 3.62776500  | -0.00256700 |
| C | -2.91478800 | -0.66065600 | 0.00659300  |
| C | -1.72997400 | -1.49025000 | -0.00587200 |
| C | -0.49130700 | -0.84050900 | 0.00390200  |
| C | -0.35037400 | 0.58255500  | -0.01240000 |
| C | -4.15070500 | -1.31904900 | 0.01193600  |
| C | -4.24870400 | -2.70396000 | 0.01036500  |
| C | -3.08975600 | -3.50414000 | -0.00153000 |
| C | -1.85340600 | -2.90756600 | -0.00848400 |
| N | 0.78680600  | -1.32784600 | -0.00295800 |
| C | 1.66995100  | -0.23477500 | -0.00345400 |
| N | 0.94043500  | 0.92923300  | -0.01382200 |
| C | 3.06284600  | -0.30922400 | -0.00504100 |
| C | 3.77580000  | -1.55809700 | -0.01286800 |
| C | 5.15238900  | -1.58861900 | -0.00477400 |
| C | 5.89913200  | -0.39710700 | 0.00949200  |
| C | 5.24180700  | 0.83967000  | 0.01327500  |
| C | 3.85783500  | 0.90699400  | 0.00549500  |
| H | -4.66965600 | 3.64788600  | 0.00060700  |
| H | -4.91175100 | 1.23552500  | 0.00263200  |
| H | -0.40064800 | 3.25909800  | -0.00583700 |
| H | -2.41807400 | 4.70552900  | -0.00379600 |
| H | -5.06818500 | -0.74748700 | 0.01928000  |
| H | -5.22607100 | -3.16931300 | 0.01613200  |
| H | -3.17451500 | -4.58324700 | -0.00568600 |

|   |             |             |             |
|---|-------------|-------------|-------------|
| H | -0.96139800 | -3.52132800 | -0.02158400 |
| H | 3.22475600  | -2.48919000 | -0.03026600 |
| H | 5.66542500  | -2.54266800 | -0.01139600 |
| H | 5.79783600  | 1.76881500  | 0.02150400  |
| H | 1.05310800  | -2.29542700 | 0.06594900  |
| H | 6.98094200  | -0.43198700 | 0.01590000  |
| O | 3.27233800  | 2.12085600  | 0.00897400  |
| H | 2.28255200  | 1.99650200  | -0.00083300 |

S1 geometry of A3-Keto in Water solvent, B3LYP/TZVP/IEFPCM,  
empirical dispersion=gd3

Energy=-993.701522

|   |             |             |             |
|---|-------------|-------------|-------------|
| C | -3.87297900 | 2.97470600  | -0.00601400 |
| C | -3.97158300 | 1.59738800  | -0.00359400 |
| C | -2.82969700 | 0.76938500  | -0.00393800 |
| C | -1.55744500 | 1.42605900  | -0.00153300 |
| C | -1.47504700 | 2.83228400  | -0.00527500 |
| C | -2.61696900 | 3.60300500  | -0.00662500 |
| C | -2.91370000 | -0.68576200 | 0.00410600  |
| C | -1.71892400 | -1.48376900 | -0.00070000 |
| C | -0.48232000 | -0.79621800 | 0.00512000  |
| C | -0.39936800 | 0.59755800  | -0.00705900 |
| C | -4.14166600 | -1.37562000 | 0.00553400  |
| C | -4.20499200 | -2.75584400 | 0.00681700  |
| C | -3.02638500 | -3.52453200 | 0.00394300  |
| C | -1.80398800 | -2.89496900 | 0.00101400  |
| N | 0.80690700  | -1.27038900 | 0.00386100  |
| C | 1.70577600  | -0.21108300 | 0.00312400  |
| N | 0.92057300  | 0.92294600  | -0.00626100 |
| C | 3.11316000  | -0.28104700 | -0.00279600 |
| C | 3.80224600  | -1.50884100 | -0.01965200 |

|   |             |             |             |
|---|-------------|-------------|-------------|
| C | 5.20231100  | -1.55503800 | -0.01659100 |
| C | 5.96353100  | -0.38072400 | -0.00136300 |
| C | 5.32455600  | 0.85796700  | 0.01080600  |
| C | 3.90505100  | 0.97419600  | 0.01071200  |
| H | -4.77499700 | 3.57373800  | -0.00689800 |
| H | -4.95789600 | 1.15623200  | -0.00310100 |
| H | -0.50441200 | 3.31266000  | -0.00576600 |
| H | -2.54662200 | 4.68297400  | -0.00854400 |
| H | -5.07069900 | -0.82326800 | 0.00706000  |
| H | -5.16971000 | -3.24715500 | 0.00899400  |
| H | -3.08180300 | -4.60561300 | 0.00387000  |
| H | -0.89817300 | -3.48849700 | -0.00295000 |
| H | 3.25645000  | -2.44371400 | -0.03679500 |
| H | 5.69599900  | -2.51879800 | -0.02797800 |
| H | 5.88852500  | 1.78282000  | 0.02129200  |
| H | 1.07340900  | -2.23973800 | 0.03872400  |
| H | 7.04490100  | -0.43640200 | 0.00029200  |
| O | 3.31994200  | 2.10299600  | 0.02227600  |
| H | 1.38370500  | 1.82827700  | -0.00580900 |

S1 geometry of A4 in Water solvent, B3LYP/TZVP/IEFPCM, empiricaldispersion=gd3

Energy=-2182.673536

|   |             |             |             |
|---|-------------|-------------|-------------|
| C | -7.89215800 | 0.92870000  | -0.02906300 |
| C | -7.16651900 | -0.25542400 | -0.07355400 |
| C | -5.76894800 | -0.25676600 | -0.06178200 |
| C | -5.12150500 | 1.01843300  | -0.01164800 |
| C | -5.87187800 | 2.21224200  | 0.03579200  |
| C | -7.24827000 | 2.16855600  | 0.02622500  |
| C | -4.98366600 | -1.50783000 | -0.11146900 |
| C | -3.56140000 | -1.47080700 | -0.09294400 |
| C | -2.93687600 | -0.19632200 | -0.05147700 |

|   |             |             |             |
|---|-------------|-------------|-------------|
| C | -3.71028300 | 1.00668900  | 0.00045900  |
| C | -5.58524000 | -2.76873800 | -0.16079000 |
| C | -4.82202200 | -3.93247000 | -0.19646800 |
| C | -3.42721200 | -3.87933600 | -0.17925600 |
| C | -2.79624900 | -2.65137700 | -0.12819200 |
| N | -1.62544400 | 0.08925900  | -0.02679500 |
| C | -1.53099100 | 1.41543500  | 0.02617200  |
| N | -2.79495700 | 2.00070500  | 0.03920800  |
| C | -0.31059200 | 2.18532400  | 0.04814100  |
| C | 0.93671300  | 1.59698300  | 0.36462700  |
| C | 2.09152700  | 2.35966900  | 0.40668600  |
| C | 2.04223900  | 3.71829300  | 0.11241100  |
| C | 0.82793200  | 4.31926300  | -0.21417900 |
| C | -0.33041400 | 3.56461000  | -0.23767300 |
| O | 1.01101400  | 0.26397700  | 0.72806200  |
| S | 1.39447700  | -0.87154400 | -0.48455600 |
| O | 0.80084900  | -2.12302900 | -0.01269500 |
| O | 0.97751000  | -0.32069300 | -1.78284900 |
| C | 3.17133100  | -0.83216000 | -0.42674400 |
| C | 3.82216100  | -0.72166500 | -1.66728600 |
| C | 5.18212600  | -0.54170000 | -1.75638700 |
| C | 5.94814600  | -0.43374700 | -0.57340700 |
| C | 5.31980000  | -0.51757100 | 0.67324800  |
| C | 3.96308800  | -0.73561000 | 0.75052800  |
| N | 3.42520100  | -0.89566900 | 2.09787100  |
| O | 3.93590400  | -0.23817100 | 3.00936600  |
| O | 2.50150900  | -1.69101300 | 2.26208100  |
| N | 7.33905400  | -0.23879500 | -0.63189700 |
| O | 8.00128600  | -0.14127000 | 0.44407700  |
| O | 7.88976000  | -0.15756600 | -1.76858500 |

|   |             |             |             |
|---|-------------|-------------|-------------|
| H | -8.97335200 | 0.88500700  | -0.03831500 |
| H | -7.71418700 | -1.18487500 | -0.11604100 |
| H | -5.36385300 | 3.16650500  | 0.07658800  |
| H | -7.82480700 | 3.08270700  | 0.06101700  |
| H | -6.66049600 | -2.86626500 | -0.17284000 |
| H | -5.32460200 | -4.89013700 | -0.23578800 |
| H | -2.84652900 | -4.79166200 | -0.20520500 |
| H | -1.71637700 | -2.57159600 | -0.10887100 |
| H | -2.99295900 | 2.98536200  | 0.13217300  |
| H | 3.02458700  | 1.88496800  | 0.67435800  |
| H | 2.95065700  | 4.30512700  | 0.14243100  |
| H | 0.78686300  | 5.37386500  | -0.44973100 |
| H | -1.25757500 | 4.04896800  | -0.51165200 |
| H | 3.23294000  | -0.75632300 | -2.57182200 |
| H | 5.66888300  | -0.46875400 | -2.71543800 |
| H | 5.90451000  | -0.44062300 | 1.57582300  |

S<sub>1</sub> geometry of B3 in Water solvent, B3LYP/TZVP/IEFPCM, empiricaldispersion=gd3

Energy=-993.689813

|   |             |             |             |
|---|-------------|-------------|-------------|
| C | -4.15653700 | 2.94593800  | 0.00431000  |
| C | -4.21302400 | 1.56003900  | 0.00329000  |
| C | -3.04707800 | 0.76806600  | 0.00333800  |
| C | -1.79766200 | 1.46603700  | 0.00021600  |
| C | -1.75897200 | 2.86657900  | 0.00223500  |
| C | -2.92760600 | 3.61279900  | 0.00308300  |
| C | -3.08678100 | -0.69059700 | -0.00577700 |
| C | -1.85588200 | -1.45986400 | 0.00414000  |
| C | -0.65546700 | -0.74287200 | -0.00462900 |
| C | -0.58667000 | 0.68896000  | 0.00973700  |
| C | -4.28551400 | -1.41835400 | -0.01212700 |
| C | -4.30982100 | -2.80501200 | -0.01185700 |



|   |             |             |             |
|---|-------------|-------------|-------------|
| C | -3.10715800 | -3.54469000 | -0.00148100 |
| C | -1.90585000 | -2.88157700 | 0.00520400  |
| N | 0.64740300  | -1.15292700 | 0.00188600  |
| C | 1.46489000  | -0.00480000 | 0.00058400  |
| N | 0.67697700  | 1.11467200  | 0.00936000  |
| C | 2.86503300  | -0.02564000 | 0.00408300  |
| C | 3.62330300  | -1.24493900 | 0.02060400  |
| C | 4.99868700  | -1.22312200 | 0.01634200  |
| C | 5.69252100  | -0.00270900 | -0.00390900 |
| C | 4.97633300  | 1.21003200  | -0.01703900 |
| C | 3.60308200  | 1.20465800  | -0.01251600 |
| O | 7.05628700  | -0.05483600 | -0.00765600 |
| H | -5.07955700 | 3.51281700  | 0.00565900  |
| H | -5.18699500 | 1.09162200  | 0.00459900  |
| H | -0.79334800 | 3.35577500  | 0.00200800  |
| H | -2.88869000 | 4.69433100  | 0.00380600  |
| H | -5.23290500 | -0.89724500 | -0.01896800 |
| H | -5.26109200 | -3.32197200 | -0.01793700 |
| H | -3.13416500 | -4.62681000 | 0.00149000  |
| H | -0.98216600 | -3.44715800 | 0.01634100  |
| H | 3.12402400  | -2.20468600 | 0.04396200  |
| H | 5.56581800  | -2.14549100 | 0.03051900  |
| H | 5.51548200  | 2.15081800  | -0.03072800 |
| H | 3.05733700  | 2.13772200  | -0.02303900 |
| H | 7.42830800  | 0.83706400  | -0.01801300 |
| H | 0.96802700  | -2.10390200 | -0.06415500 |

S<sub>1</sub> geometry of B4 in Water solvent, B3LYP/TZVP/IEFPCM, empiricaldispersion=gd3

Energy=-2182.672284

|   |            |             |             |
|---|------------|-------------|-------------|
| C | 8.42603500 | -2.34228700 | -1.24237200 |
| C | 8.36914800 | -0.99336700 | -0.91242500 |

|   |             |             |             |
|---|-------------|-------------|-------------|
| C | 7.16901200  | -0.38979100 | -0.51907400 |
| C | 6.01061200  | -1.21497700 | -0.47713700 |
| C | 6.08000000  | -2.57832900 | -0.81048300 |
| C | 7.28177400  | -3.14074600 | -1.19374000 |
| C | 7.08628500  | 1.04398200  | -0.17466600 |
| C | 5.84899800  | 1.62944700  | 0.23892500  |
| C | 4.72716400  | 0.77411200  | 0.26635300  |
| C | 4.78500600  | -0.61589200 | -0.06409800 |
| C | 8.20058100  | 1.88719200  | -0.22080600 |
| C | 8.10808400  | 3.23229600  | 0.11330800  |
| C | 6.89131600  | 3.79446300  | 0.51220900  |
| C | 5.76937600  | 2.99833600  | 0.57220600  |
| N | 3.43336600  | 0.99699100  | 0.59420200  |
| C | 2.74878800  | -0.19925300 | 0.45942100  |
| N | 3.57089000  | -1.17646300 | 0.05922800  |
| C | 1.34388800  | -0.35973800 | 0.71022800  |
| C | 0.52832000  | 0.71116800  | 1.12439300  |
| C | -0.81976100 | 0.51690300  | 1.33840500  |
| C | -1.37513300 | -0.74961600 | 1.14085700  |
| C | -0.58166200 | -1.83462500 | 0.76110700  |
| C | 0.76495000  | -1.63377200 | 0.53947900  |
| O | -2.71445300 | -0.87042800 | 1.43903500  |
| H | 9.37285200  | -2.77342000 | -1.54061700 |
| H | 9.28200900  | -0.41896100 | -0.96487200 |
| H | 5.17734800  | -3.17233900 | -0.76247700 |
| H | 7.33660600  | -4.18973900 | -1.45230400 |
| H | 9.16351100  | 1.50464800  | -0.52379000 |
| H | 8.99464700  | 3.85070900  | 0.06280900  |
| H | 6.83193700  | 4.84315700  | 0.76927300  |
| H | 4.82339300  | 3.42464000  | 0.87884300  |

|   |             |             |             |
|---|-------------|-------------|-------------|
| H | 0.93375700  | 1.70141100  | 1.27827000  |
| H | -1.45324000 | 1.33054000  | 1.66241300  |
| H | -1.01787300 | -2.81391000 | 0.64138000  |
| H | 1.39207700  | -2.46112300 | 0.24020500  |
| H | 3.03996300  | 1.87874300  | 0.88528800  |
| S | -3.84541900 | -1.68377800 | 0.45247400  |
| O | -4.56934400 | -2.52971900 | 1.40367900  |
| O | -3.10452300 | -2.27593200 | -0.66808900 |
| C | -4.84113900 | -0.29437300 | -0.04026200 |
| C | -4.24946000 | 0.97141700  | -0.14664100 |
| C | -6.23901900 | -0.39997400 | -0.25766000 |
| C | -5.00159100 | 2.09401000  | -0.40735800 |
| H | -3.18706400 | 1.08310800  | -0.00095600 |
| C | -7.00729900 | 0.71669500  | -0.48863100 |
| C | -6.40113200 | 1.97713800  | -0.56027700 |
| H | -4.53628800 | 3.06305000  | -0.48864800 |
| H | -8.06644200 | 0.61726500  | -0.66498900 |
| N | -6.91537200 | -1.68652400 | -0.39529000 |
| N | -7.19213700 | 3.10883200  | -0.81817200 |
| O | -8.09803400 | -1.76983600 | -0.06525500 |
| O | -6.26564400 | -2.62137500 | -0.86831900 |
| O | -8.44808000 | 2.97645500  | -0.94313100 |
| O | -6.62199000 | 4.23712200  | -0.91126500 |
